# Supplementary material
Source: Springer Nature journal article supplement (https://www.springermedizin.de/resource/supplementary/12874_2008_354_MOESM3_ESM.pdf/9434296)
Supplement: MOESM3 [file 9434296]

-----Web- KIDMAP-----

Ability = 3.48 logits

SE = 0.45

Infit MNSQ = 0.99 (within < 2.0)

Outfit MNSQ = 0.95

Infit ZSTD = 0.1 (within +/-2.58)

Outfit ZSTD = 0.0

Test Reliability = 0.94

Person Reliability = 0.97

prob.-----Harder Achieved-----Harder Not Achieved-----measures-----freq(%)--- each # =2.6

|       |      |         |        |        |      |              |
|-------|------|---------|--------|--------|------|--------------|
|       |      |         |        |        | 9.2  | 25(6)#####   |
|       |      |         |        |        | 9.1  |              |
|       |      |         |        |        | 5.4  | 1(16).       |
|       |      |         |        |        | 5.3  | 4(17)##      |
| 0.15  |      | 10.5.4  | 2.5.4  | 21.5.4 | 5.2  | 3(18).       |
| 0.17  | 4.5* | 8.5.4   |        |        | 5.1  | 8(20)###.    |
| 0.18  |      | 11.5.4  | 15.5.4 |        | 5    | 1(20).       |
| 0.19  |      | 6.5.4   | 7.5.4  | 3.5.4  | 4.9  | 9(22)###.    |
| 0.21  |      | 1.5.4   | 16.5.4 | 20.5.4 | 4.8  | 4(23)##      |
| 0.23  | 17.4 | 14.5.4  |        |        | 4.7  | 5(24)##      |
| 0.25  |      | 12.5.4  |        |        | 4.6  | 1(24).       |
|       |      |         |        |        | 4.5  | 11(26)####.  |
| 0.28  | 5.5  |         |        |        | 4.4  | 1(27).       |
|       |      |         |        |        | 4.3  | 7(28)###     |
| 0.33  | 18.4 |         |        |        | 4.2  | 11(31)####.  |
|       |      |         |        |        | 4.1  | 1(31).       |
|       |      |         |        |        | 4    | 3(32).       |
|       |      |         |        |        | 3.9  | 6(33)##.     |
| ..... |      |         |        |        |      |              |
|       |      |         |        |        | 3.8  | 3(34).       |
|       |      |         |        |        | 3.7  | 8(35)###.    |
|       |      |         |        |        | 3.6  | 1(36).       |
|       |      | XXX     |        |        | 3.5  | 11(38)####.* |
|       |      |         |        |        | 3.4  | 1(38).       |
|       |      |         |        |        | 3.3  | 2(39).       |
|       |      |         |        |        | 3.2  | 8(40)###.    |
|       |      |         |        |        | 3.1  |              |
| ..... |      |         |        |        |      |              |
|       |      |         |        |        | 3    | 14(44)#####. |
|       |      |         |        |        | 1.3  | 12(74)#####  |
|       |      |         |        |        | 1.2  |              |
|       |      |         |        |        | 1.1  | 13(77)#####  |
|       |      |         |        |        | 1    | 8(79)###.    |
| 0.93  | 13.3 | 9.4     |        |        | 0.9  | 2(80).       |
|       |      |         |        |        | 0.8  | 8(81)###.    |
|       |      |         |        |        | 0.7  | 3(82).       |
|       |      |         |        |        | 0.6  | 10(84)####   |
|       |      |         |        |        | 0.5  | 3(85).       |
|       |      |         |        |        | 0.4  |              |
| 0.96  |      | 19.4.3^ |        |        | 0.3  | 4(86)##      |
|       |      |         |        |        | 0.2  | 11(88)####.  |
|       |      |         |        |        | -2   | 1(100).      |
|       |      |         |        |        | -2.1 | 1(100).      |
|       |      |         |        |        | -2.2 |              |
|       |      |         |        |        | -2.3 |              |

-Expected Score(Easier)-----Unexpected Score(Less) -----
